# Supplementary material for: Sodium ion doped graphitic carbon nitride with high crystallinity for superior photocatalytic hydrogen evolution efficiency
Source: Royal Society of Chemistry journal article supplement (doi:10.1039/d3ta02887a), 2023-01-01
Supplement: d3ta02887a1.pdf [file d3ta02887a1.pdf]

Electronic supplementary information for  
**Sodium ion doped graphitic carbon nitride with high  
crystallinity for superior photocatalytic hydrogen evolution  
efficiency**

*Xue Han, Yuna kang, Shuang Song, Rong Lu\* and Anchi Yu \**

*Department of Chemistry, Renmin University of China, Beijing 100872, P. R. China*

**Additional figures:**

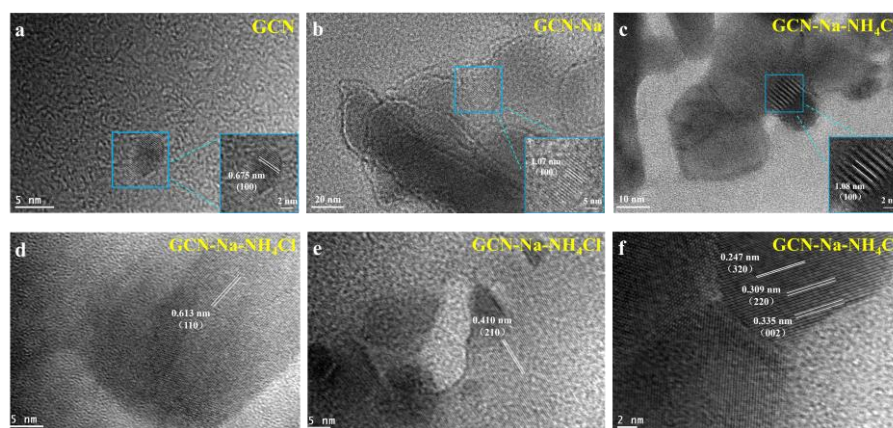

**Fig. S1** High resolution TEM images of GCN (a), GCN-Na (b) and GCN-Na-NH<sub>4</sub>Cl (c-f).

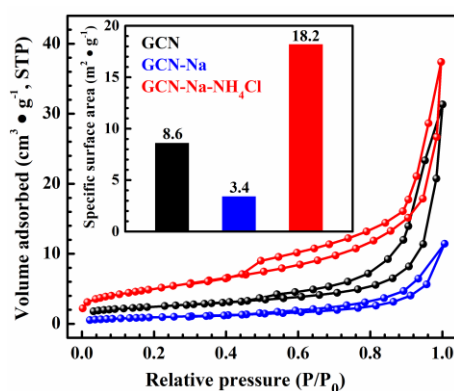

**Fig. S2** BET nitrogen adsorption/desorption isotherms for GCN, GCN-Na and GCN-Na-NH<sub>4</sub>Cl. Inset shows their BET specific surface areas.

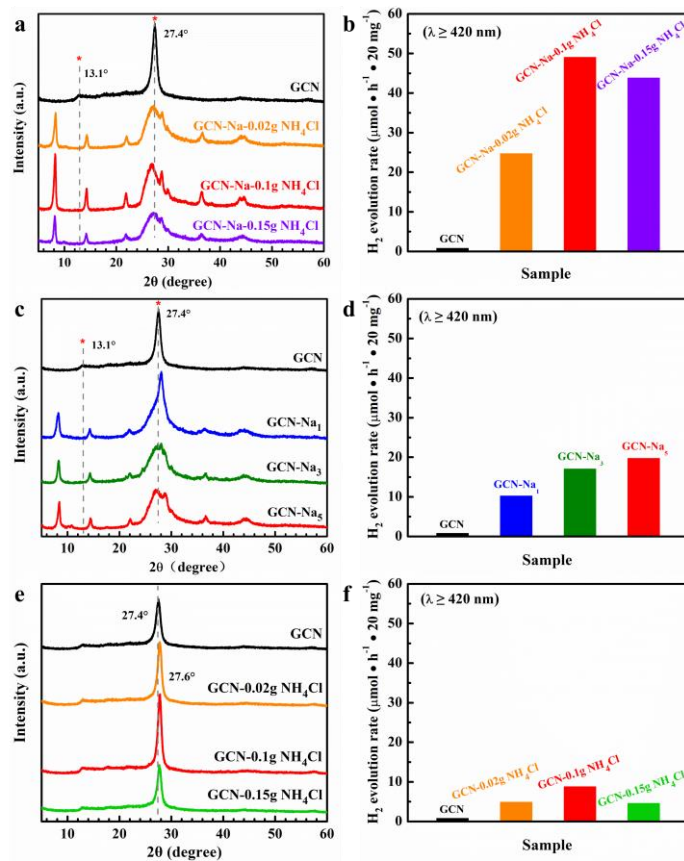

**Fig. S3** XRD patterns (a) and photocatalytic H<sub>2</sub> evolution rates (b) of GCN and GCN-Na-NH<sub>4</sub>Cl with different NH<sub>4</sub>Cl loadings; XRD patterns (c) and photocatalytic H<sub>2</sub> evolution rates (d) of GCN and GCN-Na with different NaCl loadings; XRD patterns (e) and photocatalytic H<sub>2</sub> evolution rates (f) of GCN and GCN-NH<sub>4</sub>Cl with different NH<sub>4</sub>Cl loadings.

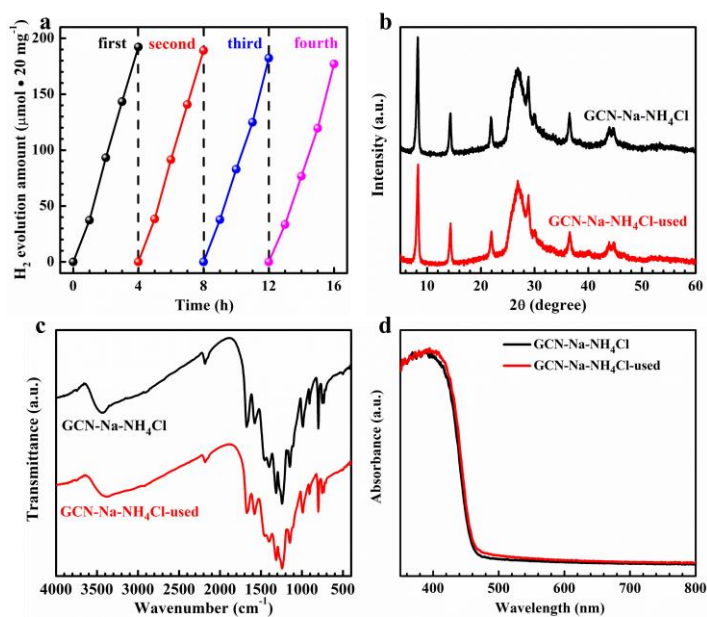

**Fig. S4** Stability test of photocatalytic H<sub>2</sub> evolution (a) for GCN-Na-NH<sub>4</sub>Cl under visible light irradiation; XRD patterns (b), FTIR spectra (c), and DRS spectra (d) for GCN-Na-NH<sub>4</sub>Cl before and after photocatalytic H<sub>2</sub> evolution.

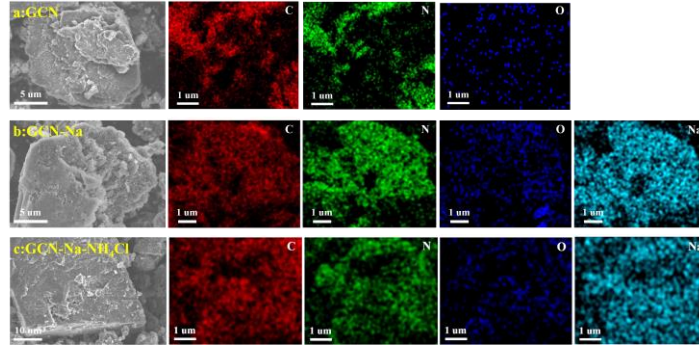

**Fig. S5** Element mapping images of GCN (a), GCN-Na (b) and GCN-Na-NH<sub>4</sub>Cl (c).

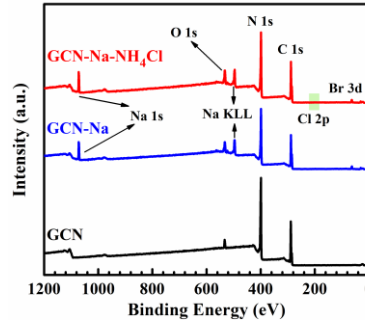

**Fig. S6** XPS survey spectra of GCN, GCN-Na and GCN-Na-NH<sub>4</sub>Cl.

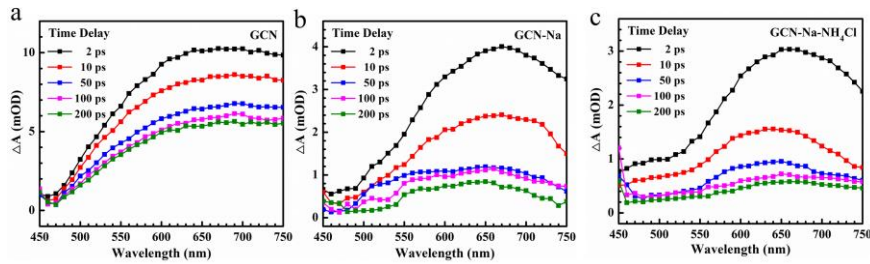

**Fig. S7** Femtosecond transient absorption spectra of GCN (a), GCN-Na (b), and GCN-Na-NH<sub>4</sub>Cl (c) aqueous dispersions at various time delays under pump density of 50 μJ/cm<sup>2</sup>. The pump wavelength is 398 nm.

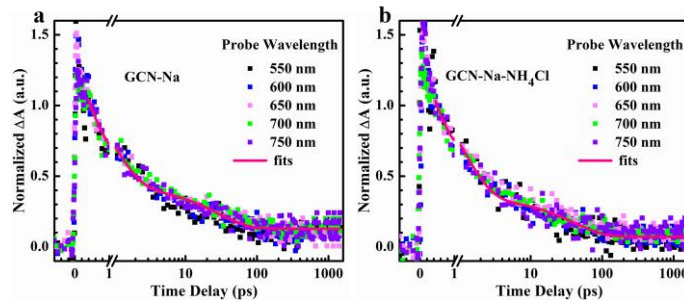

**Fig. S8** Normalized transient absorption kinetic traces of GCN-Na (a) and GCN-Na-NH<sub>4</sub>Cl (b) aqueous dispersions at various probe wavelengths under pump density of 50 μJ/cm<sup>2</sup>. The pump wavelength is 398 nm. The coherence spikes at ~200 fs time delay come from water solvent. The solid line is the fitting curve with a combination function of a stretched-exponential decay function and a single exponential decay function. The fitting function with one set of fitting parameters could fit all the transient absorption kinetic traces of GCN-Na at various probe wavelengths. Similarly, the fitting function with one set of fitting parameters could also fit all the transient absorption kinetic traces of GCN-Na-NH<sub>4</sub>Cl at various probe wavelengths.

**Additional tables:****Table S1** Elemental compositions determined by SEM-EDS.

| Sample                    | C/N  | O (at. %) | Na (at. %) |
|---------------------------|------|-----------|------------|
| GCN                       | 0.69 | 2.7±0.56  | --         |
| GCN-Na                    | 0.75 | 4.5±0.65  | 4.7±0.95   |
| GCN-Na-NH <sub>4</sub> Cl | 0.67 | 4.4±0.63  | 5.4±1.80   |

**Table S2** Elemental compositions determined by XPS.

| Sample                    | C 1s<br>(at. %) | N 1s<br>(at. %) | O 1s<br>(at. %) | Na 1s<br>(at. %) | Br 3d<br>(at. %) | Cl 2p<br>(at. %) |
|---------------------------|-----------------|-----------------|-----------------|------------------|------------------|------------------|
| GCN                       | 45.65           | 51.27           | 3.08            | --               | --               | --               |
| GCN-Na                    | 47.37           | 44.52           | 4.05            | 4.02             | 0.04             | --               |
| GCN-Na-NH <sub>4</sub> Cl | 46.03           | 45.44           | 4.67            | 3.74             | 0.02             | 0.09             |
